# Supplementary material for: Maternal Diet High in Linoleic Acid Alters Renal Branching Morphogenesis and mTOR/AKT Signalling Genes in Rat Fetal Kidneys
Source: MDPI journal article supplement (doi:10.3390/ijms25094688), 2024-04-25
Supplement: s1 [file s1]

Supplementary file

Table S1: Accession numbers and targets analysed by real time PCR

| mRNA   | RefSeqID     |
|--------|--------------|
| Ret    | NM_001110099 |
| Gdnf   | NM_019139    |
| Tgfb1  | NM_021578    |
| Gfra1  | NM_012959    |
| Lepr1  | NM_012596    |
| Jak2   | NM_031514    |
| Stat3  | NM_012747    |
| Stat5a | NM_017064    |
| Lrp2   | NM_030827    |
| mTOR   | NM_019906    |
| Pi3kca | NM_133399    |
| Prkaa1 | NM_019142    |
| Prkab2 | NM_022627    |
| Akt3   | NM_031575    |
| Flt1   | NM_019306    |
| Vegf   | NM_001110334 |
